# Supplementary material for: Validity and reliability of the Colorado Adult Joint Assessment Scale in adults with moderate‐severe hemophilia A
Source: PubMed Central journal article supplement — J Thromb Haemost. 2019 Nov 13;18(2):285–94. doi: 10.1111/jth.14651 (PMC7028129; doi:10.1111/jth.14651), 2019-11-13
Supplement: JTH-18-285-s002.pdf [file JTH-18-285-s002.pdf]

# Colorado Adult Joint Assessment Worksheet Version 2.0

\_\_\_\_\_ Patient ID

Date of Evaluation \_\_\_\_\_  
MM DD YY

Height: \_\_\_\_\_ cm      Waist / Hip Ratio: \_\_\_\_\_

Weight: \_\_\_\_\_ kgs      Dominant Side:  Left  
 Right

Indicate any areas of joint or muscle bleeding within the last 2 weeks:

|        | Ankle                    | Elbow                    | Knee                     | Hip                      | Shoulder                 | Calf                     | Quad                     | Bicep                    | Tricep                   | Hamstring                | Gluteal                  | Iliopsoas                | Anterior tib.            |
|--------|--------------------------|--------------------------|--------------------------|--------------------------|--------------------------|--------------------------|--------------------------|--------------------------|--------------------------|--------------------------|--------------------------|--------------------------|--------------------------|
| Left:  | <input type="checkbox"/> |
| Right: | <input type="checkbox"/> |

| Swelling                                                                                                                                                                                                                                                                                                                             | Left Ankle                                                                                                       | Right Ankle                                                                                                      | Left Elbow                                                                                                       | Right Elbow                                                                                                      | Left Knee                                                                                                        | Right Knee                                                                                                       |
|--------------------------------------------------------------------------------------------------------------------------------------------------------------------------------------------------------------------------------------------------------------------------------------------------------------------------------------|------------------------------------------------------------------------------------------------------------------|------------------------------------------------------------------------------------------------------------------|------------------------------------------------------------------------------------------------------------------|------------------------------------------------------------------------------------------------------------------|------------------------------------------------------------------------------------------------------------------|------------------------------------------------------------------------------------------------------------------|
| Comments:                                                                                                                                                                                                                                                                                                                            |                                                                                                                  |                                                                                                                  |                                                                                                                  |                                                                                                                  |                                                                                                                  |                                                                                                                  |
| Puffy, Boggy, Tense ( P, B, T )                                                                                                                                                                                                                                                                                                      | <input type="checkbox"/> P <input type="checkbox"/> B <input type="checkbox"/> T                                 | <input type="checkbox"/> P <input type="checkbox"/> B <input type="checkbox"/> T                                 | <input type="checkbox"/> P <input type="checkbox"/> B <input type="checkbox"/> T                                 | <input type="checkbox"/> P <input type="checkbox"/> B <input type="checkbox"/> T                                 | <input type="checkbox"/> P <input type="checkbox"/> B <input type="checkbox"/> T                                 | <input type="checkbox"/> P <input type="checkbox"/> B <input type="checkbox"/> T                                 |
| <b>Landmarks:</b><br>Visible (V); Not Visible (NV)<br>Palpable (P); Not Palpable (NP)                                                                                                                                                                                                                                                | <input type="checkbox"/> V <input type="checkbox"/> NV<br><input type="checkbox"/> P <input type="checkbox"/> NP | <input type="checkbox"/> V <input type="checkbox"/> NV<br><input type="checkbox"/> P <input type="checkbox"/> NP | <input type="checkbox"/> V <input type="checkbox"/> NV<br><input type="checkbox"/> P <input type="checkbox"/> NP | <input type="checkbox"/> V <input type="checkbox"/> NV<br><input type="checkbox"/> P <input type="checkbox"/> NP | <input type="checkbox"/> V <input type="checkbox"/> NV<br><input type="checkbox"/> P <input type="checkbox"/> NP | <input type="checkbox"/> V <input type="checkbox"/> NV<br><input type="checkbox"/> P <input type="checkbox"/> NP |
| <b>Scores:</b>                                                                                                                                                                                                                                                                                                                       |                                                                                                                  |                                                                                                                  |                                                                                                                  |                                                                                                                  |                                                                                                                  |                                                                                                                  |
| <b>Swelling Scoring:</b><br>0 = None<br>1 = Mild – slightly puffy; slight palpable swelling may not be measurable<br>2 = Moderate – looks swollen; feels firm or boggy; measurable difference; bony landmarks palpable only<br>3 = Severe – looks very swollen; is tense; measurable difference; bony landmarks difficult to palpate |                                                                                                                  |                                                                                                                  |                                                                                                                  |                                                                                                                  |                                                                                                                  |                                                                                                                  |

| Muscle Atrophy<br>To be measured in a non-weightbearing position.<br><br>Muscle atrophy is a difference in circumference of > .5 cm. If difference is <= .5cm, do not note muscle atrophy unless both muscles appear atrophied by description. | Ankle<br>____ cm from popliteal fossa;<br>Measure largest part of muscle belly. |       | Elbow<br>a. ____ cm above antecubital<br>b. ____ cm below antecubital |                            | Knee<br>____ cm from medial joint line;<br>Measure up to largest point of VMO. |       |
|------------------------------------------------------------------------------------------------------------------------------------------------------------------------------------------------------------------------------------------------|---------------------------------------------------------------------------------|-------|-----------------------------------------------------------------------|----------------------------|--------------------------------------------------------------------------------|-------|
|                                                                                                                                                                                                                                                | Left                                                                            | Right | Left                                                                  | Right                      | Left                                                                           | Right |
|                                                                                                                                                                                                                                                |                                                                                 |       |                                                                       | a. _____ cm<br>b. _____ cm | a. _____ cm<br>b. _____ cm                                                     |       |
| <b>Scores:</b>                                                                                                                                                                                                                                 |                                                                                 |       |                                                                       |                            |                                                                                |       |
| <b>Muscle Atrophy Scoring:</b><br>0 = None.<br>1 = Mild – muscle has slightly less contour than contralateral side<br>2 = Moderate – flattening of muscle belly<br>3 = Severe – severe muscle wasting and depression                           |                                                                                 |       |                                                                       |                            |                                                                                |       |

# Colorado Adult Joint Assessment Worksheet

Version 2.0

|  |  |  |  |  |  |  |  |  |  |  |
|--|--|--|--|--|--|--|--|--|--|--|
|  |  |  |  |  |  |  |  |  |  |  |
|--|--|--|--|--|--|--|--|--|--|--|

Patient ID

Date of Evaluation

|  |  |  |  |  |
|--|--|--|--|--|
|  |  |  |  |  |
|--|--|--|--|--|

MM      DD      YY

| Axial Deformity | Ankle        |              |              |              | Knee         |              |              |              |
|-----------------|--------------|--------------|--------------|--------------|--------------|--------------|--------------|--------------|
|                 | Left         |              | Right        |              | Left         |              | Right        |              |
|                 | _____ valgus |
| _____ varus     | _____ varus  | _____ varus  | _____ varus  | _____ varus  | _____ varus  | _____ varus  | _____ varus  |              |
| <b>Scores:</b>  |              |              |              |              |              |              |              |              |

Axial Deformity Scoring:  
 Ankle: 0 = No deformity  
         1 = 1°-10° valgus; 0-5° varus  
         2 = >10° valgus or >5° varus  
 Knee: 0 = No deformity  
        1 = 9°-15° valgus; 0-5° varus  
        2 = >15° valgus or >5° varus

| Crepitus       | Ankle |  |       |  | Elbow |  |       |  | Knee |  |       |  |
|----------------|-------|--|-------|--|-------|--|-------|--|------|--|-------|--|
|                | Left  |  | Right |  | Left  |  | Right |  | Left |  | Right |  |
|                |       |  |       |  |       |  |       |  |      |  |       |  |
| <b>Scores:</b> |       |  |       |  |       |  |       |  |      |  |       |  |

Crepitus Scoring:  
 0 = None.  
 1 = Mild – crepitus slightly present; barely detectable audible or palpable sensation during motion  
 2 = Moderate – crepitus more easily felt & heard; more pronounced crackling and/or rough sound or sensation during motion  
 3 = Severe – crepitus very pronounced; very audible & palpable grinding & crunching during motion

# Colorado Adult Joint Assessment Worksheet

Version 2.0

|  |  |  |  |  |  |  |  |  |  |
|--|--|--|--|--|--|--|--|--|--|
|  |  |  |  |  |  |  |  |  |  |
|--|--|--|--|--|--|--|--|--|--|

Patient ID

Date of Evaluation

|    |    |    |  |  |
|----|----|----|--|--|
|    |    |    |  |  |
| MM | DD | YY |  |  |

| Range of Motion                                         | Ankle          |                | Elbow          |                | Knee           |                |
|---------------------------------------------------------|----------------|----------------|----------------|----------------|----------------|----------------|
|                                                         | Left           | Right          | Left           | Right          | Left           | Right          |
| Dorsiflexion (DF)<br>Extension (Ext)                    | (DF)           | (DF)           | (Ext)          | (Ext)          | (Ext)          | (Ext)          |
| Hyperextension (Hyp)                                    | N/A            | N/A            | (Hyp)          | (Hyp)          | (Hyp)          | (Hyp)          |
| Plantarflexion (PF)<br>Flexion (Flex)                   | (PF)           | (PF)           | (Flex)         | (Flex)         | (Flex)         | (Flex)         |
| Calculation formula ...                                 |                |                |                |                |                |                |
| Normal Full Range of Motion (FROM)                      | total 70°      | total 70°      | 0-150°         | 0-150°         | 0-135°         | 0-135°         |
| Full range of motion (FROM)<br>- Extension<br>- Flexion | ____°<br>____° | ____°<br>____° | ____°<br>____° | ____°<br>____° | ____°<br>____° | ____°<br>____° |
| % of normal (FROM/normal x 100)                         | %              | %              | %              | %              | %              | %              |
| Loss of FROM (100% - % of normal)                       | %              | %              | %              | %              | %              | %              |
| <b>Scores:</b>                                          |                |                |                |                |                |                |

Range of Motion Scoring:  
 0 = No loss.  
 1 = Loss of <10% of total full ROM  
 2 = Loss of 10% - 33% of total full ROM  
 3 = Loss of >33% of total full ROM

Note: If joint is hyper-extended, place 0 in Extension box.  
 When adding together flexion and extension, use the hyperextension number.  
 Then increase the denominator by the degrees of hyperextension.

| Contracture                                                                     | Ankle    |          | Elbow     |           | Knee      |           |
|---------------------------------------------------------------------------------|----------|----------|-----------|-----------|-----------|-----------|
|                                                                                 | Left     | Right    | Left      | Right     | Left      | Right     |
| If DF / Ext >= 0 Then<br>Contracture Score = 0.<br>Otherwise Score = 1, 2 or 3. | DF _____ | DF _____ | Ext _____ | Ext _____ | Ext _____ | Ext _____ |
| <b>Scores:</b>                                                                  |          |          |           |           |           |           |

Contracture Scoring:  
 0 = No contracture  
 1 = 1° to 7°  
 2 = 8° to 15°  
 3 = >15°

# Colorado Adult Joint Assessment Worksheet Version 2.0

|  |  |  |  |  |  |  |  |  |  |  |
|--|--|--|--|--|--|--|--|--|--|--|
|  |  |  |  |  |  |  |  |  |  |  |
|--|--|--|--|--|--|--|--|--|--|--|

Patient ID

Date of Evaluation

|    |    |    |  |  |  |
|----|----|----|--|--|--|
|    |    |    |  |  |  |
| MM | DD | YY |  |  |  |

| Instability                                                                                                                                                                                        | Ankle |  |       |  | Elbow |  |       |  | Knee |  |       |  |  |
|----------------------------------------------------------------------------------------------------------------------------------------------------------------------------------------------------|-------|--|-------|--|-------|--|-------|--|------|--|-------|--|--|
|                                                                                                                                                                                                    | Left  |  | Right |  | Left  |  | Right |  | Left |  | Right |  |  |
| Scores :                                                                                                                                                                                           |       |  |       |  |       |  |       |  |      |  |       |  |  |
| Instability Scoring:<br>0 = None<br>1 = Noted on exam but doesn't interfere with function or require bracing<br>2 = Instability that creates a functional deficit or requires bracing or orthotics |       |  |       |  |       |  |       |  |      |  |       |  |  |

| Strength                                                                                                                                                                                                                                                                                                                                                                                                                                                                                                                                                                           | Ankle |  |       |  | Elbow |  |       |  | Knee |  |       |  |  |
|------------------------------------------------------------------------------------------------------------------------------------------------------------------------------------------------------------------------------------------------------------------------------------------------------------------------------------------------------------------------------------------------------------------------------------------------------------------------------------------------------------------------------------------------------------------------------------|-------|--|-------|--|-------|--|-------|--|------|--|-------|--|--|
|                                                                                                                                                                                                                                                                                                                                                                                                                                                                                                                                                                                    | Left  |  | Right |  | Left  |  | Right |  | Left |  | Right |  |  |
| Scores :                                                                                                                                                                                                                                                                                                                                                                                                                                                                                                                                                                           |       |  |       |  |       |  |       |  |      |  |       |  |  |
| Strength Scoring:<br>0 = Moves through full range of motion against gravity, takes maximal resistance (Grade 5)<br>1 = Moves through full or available range of motion against gravity. Takes moderate resistance if full range. Takes maximum resistance if available range. (Grade 4 to 5-)<br>2 = Moves through full or available range of motion against gravity, takes minimal resistance (Grade 3 to 4-)<br>3 = Moves through full or available range of motion. (Grade 2+ / 3-)<br>4 = Unable to move through full or available range due to weakness. (anything < Grade 2) |       |  |       |  |       |  |       |  |      |  |       |  |  |

# Colorado Adult Joint Assessment Score Sheet Version 2.0

|  |  |  |  |  |  |  |  |  |  |  |
|--|--|--|--|--|--|--|--|--|--|--|
|  |  |  |  |  |  |  |  |  |  |  |
|--|--|--|--|--|--|--|--|--|--|--|

Patient ID

Date of Evaluation

|  |  |  |  |  |
|--|--|--|--|--|
|  |  |  |  |  |
|--|--|--|--|--|

MM      DD      YY

| Gait                        | Ankle                        |                             |                              |                             |                                                                                                                                                                                                                                                                                                                                                                                                                                                                                                                       | Knee                         |                             |                              |                             |
|-----------------------------|------------------------------|-----------------------------|------------------------------|-----------------------------|-----------------------------------------------------------------------------------------------------------------------------------------------------------------------------------------------------------------------------------------------------------------------------------------------------------------------------------------------------------------------------------------------------------------------------------------------------------------------------------------------------------------------|------------------------------|-----------------------------|------------------------------|-----------------------------|
|                             | Left                         |                             | Right                        |                             |                                                                                                                                                                                                                                                                                                                                                                                                                                                                                                                       | Left                         |                             | Right                        |                             |
| Walking :                   |                              |                             |                              |                             | <b>* Other Joint Interference:</b> Mark "YES" to indicate that the lack of capabilities of another lower extremity joint prevents the full Gait evaluation of <b>the joint that is being scored</b> . The Gait score for this joint should reflect the worst observable score with an understanding that this joint might score differently (better) if more test skills could be performed. If marked "YES", the joint being scored should not score a 0 for Gait because all tasks could not be performed normally. |                              |                             |                              |                             |
| Stairs :                    |                              |                             |                              |                             |                                                                                                                                                                                                                                                                                                                                                                                                                                                                                                                       |                              |                             |                              |                             |
| Running :                   |                              |                             |                              |                             |                                                                                                                                                                                                                                                                                                                                                                                                                                                                                                                       |                              |                             |                              |                             |
| Skipping :                  |                              |                             |                              |                             |                                                                                                                                                                                                                                                                                                                                                                                                                                                                                                                       |                              |                             |                              |                             |
| Other Joint Interference* : | <input type="checkbox"/> Yes | <input type="checkbox"/> No | <input type="checkbox"/> Yes | <input type="checkbox"/> No |                                                                                                                                                                                                                                                                                                                                                                                                                                                                                                                       | <input type="checkbox"/> Yes | <input type="checkbox"/> No | <input type="checkbox"/> Yes | <input type="checkbox"/> No |
| <b>Scores:</b>              |                              |                             |                              |                             |                                                                                                                                                                                                                                                                                                                                                                                                                                                                                                                       |                              |                             |                              |                             |

|                                                                                                                                                                                                      |                                                                                                                                                                                                                                 |                                                                                                                                                                                                                   |                                                                                                                                                                                                                                                    |
|------------------------------------------------------------------------------------------------------------------------------------------------------------------------------------------------------|---------------------------------------------------------------------------------------------------------------------------------------------------------------------------------------------------------------------------------|-------------------------------------------------------------------------------------------------------------------------------------------------------------------------------------------------------------------|----------------------------------------------------------------------------------------------------------------------------------------------------------------------------------------------------------------------------------------------------|
| <b>Gait Scoring:</b><br>0 = Normal walking, stairs, running, skipping.<br>1 = Normal walking, abnormal stairs, running, or skipping.<br>2 = Abnormal walking and stairs. – no further skills tested. | <u>Ankle Normal Gait Components:</u><br>1. Equal weight shift.<br>2. Heel-toe pattern.<br>3. Good plantarflexion push-off.<br>4. Steps of equal length.<br>5. Steps of equal cadence.<br>6. Toes pointed symmetrically forward. | If any of the normal gait components are not being done correctly then the skill (walking, stairs, running or skipping) will be considered abnormal. Score each knee and ankle joint independently of the others. | <u>Knee Normal Gait Components:</u><br>1. Equal weight shift.<br>2. Heel strike with full knee extension.<br>3. Good knee extension push-off.<br>4. Steps of equal length.<br>5. Steps of equal cadence.<br>6. Toes pointed symmetrically forward. |
|------------------------------------------------------------------------------------------------------------------------------------------------------------------------------------------------------|---------------------------------------------------------------------------------------------------------------------------------------------------------------------------------------------------------------------------------|-------------------------------------------------------------------------------------------------------------------------------------------------------------------------------------------------------------------|----------------------------------------------------------------------------------------------------------------------------------------------------------------------------------------------------------------------------------------------------|

|                                                          |                                                                                                           |
|----------------------------------------------------------|-----------------------------------------------------------------------------------------------------------|
| <b>COMMENTS:</b><br><br><br><br><br><br><br><br><br><br> | Name of Assessor:<br><br><hr style="width: 80%; margin-left: auto; margin-right: 0;"/><br><br>Date: _____ |
|----------------------------------------------------------|-----------------------------------------------------------------------------------------------------------|

# Colorado Adult Joint Assessment Score Sheet Version 2.0

|  |  |  |  |  |  |  |  |  |  |
|--|--|--|--|--|--|--|--|--|--|
|  |  |  |  |  |  |  |  |  |  |
|--|--|--|--|--|--|--|--|--|--|

Patient ID

Date of Evaluation

|    |    |    |  |  |
|----|----|----|--|--|
|    |    |    |  |  |
| MM | DD | YY |  |  |

|                               | Ankle |       | Elbow |       | Knee |       |
|-------------------------------|-------|-------|-------|-------|------|-------|
|                               | Left  | Right | Left  | Right | Left | Right |
| Swelling                      |       |       |       |       |      |       |
| Muscle Atrophy                |       |       |       |       |      |       |
| Axial Deformity               |       |       |       |       |      |       |
| Crepitus                      |       |       |       |       |      |       |
| Range of Motion               |       |       |       |       |      |       |
| Contracture                   |       |       |       |       |      |       |
| Instability                   |       |       |       |       |      |       |
| Strength                      |       |       |       |       |      |       |
| <b>Total (without Gait) :</b> |       |       |       |       |      |       |

|                                    |  |  |  |  |  |  |
|------------------------------------|--|--|--|--|--|--|
| Gait                               |  |  |  |  |  |  |
| Other Joint Interference* (Y or N) |  |  |  |  |  |  |
| <b>Total (with Gait) :</b>         |  |  |  |  |  |  |

**Swelling Scoring:**

- 0 = None.
- 1 = Mild – slightly puffy; slight palpable swelling; may not be measurable
- 2 = Moderate – looks swollen; feels firm or boggy; measurable difference; bony landmarks palpable only
- 3 = Severe – looks very swollen, is tense, measurable difference, bony landmarks difficult to palpate.

**Muscle Atrophy Scoring:**

- 0 = None
- 1 = Mild – muscle has less contour than contralateral side
- 2 = Moderate – flattening of muscle belly
- 3 = Severe – severe muscle wasting and depression

**Crepitus Scoring:**

- 0 = None
- 1 = Mild – crepitus slightly present; barely detectable audible or palpable sensation during motion
- 2 = Moderate – crepitus more easily felt & heard; more pronounced crackling and /or rough sound or sensation during motion
- 3 = Severe – crepitus very pronounced; very audible & palpable grinding & crunching during motion

**Range of Motion Scoring:**

- 0 = No loss
- 1 = Loss of <10% of total full ROM
- 2 = Loss of 10% to 33% of total full ROM
- 3 = Loss of >33% of total full ROM

**Contracture Scoring:**

- 0 = No contracture
- 1 = 1° to 7°
- 2 = 8° to 15°
- 3 = >15°

**Instability Scoring:**

- 0 = None
- 1 = Noted on exam but doesn't interfere with function or require bracing
- 2 = Instability that creates a functional deficit or requires bracing or orthotics

**Axial Deformity Scoring:**

- Ankle:
- 0 = No deformity
  - 1 = 1°-10° valgus; 0-5° varus
  - 2 = >10° valgus or >5° varus
- Knee:
- 0 = No deformity
  - 1 = 9°-15° valgus; 0-5° varus
  - 2 = >15° valgus or >5° varus

**Strength Scoring:**

- 0 = Moves through full range of motion against gravity, takes maximal resistance (Grade 5)
- 1 = Moves through full or available range of motion against gravity. Takes moderate resistance if full range. Takes maximum resistance if available range. (Grade 4 to 5-)
- 2 = Moves through full or available range of motion against gravity, takes minimal resistance (Grade 3 to 4-)
- 3 = Moves through full or available range of motion. (Grade 2+ / 3-)
- 4 = Unable to move through full or available range due to weakness (anything < Grade 2)

**Gait Scoring:**

- 0 = Normal walking, stairs, running, and skipping
- 1 = Normal walking, abnormal stairs, running, or skipping
- 2 = Abnormal walking and stairs – no further skills tested

**Other Joint Interference: Yes/No** – Mark "YES" to indicate that the lack of capabilities of another lower extremity joint prevents the full Gait evaluation of the joint that is being scored. The Gait score for this joint should reflect the worst observable score with an understanding that this joint might score differently (better) if more test skills could be performed. If marked "YES", the joint being scored should not score a 0 for Gait because all tasks could not be performed normally
